# Supplementary material for: Phylogenetic Affinity in the Potential Antagonism of Trichoderma spp. against Moniliophthora roreri
Source: MDPI journal article supplement (doi:10.3390/agronomy12092052), 2022-08-28
Supplement: s1 [file s1]

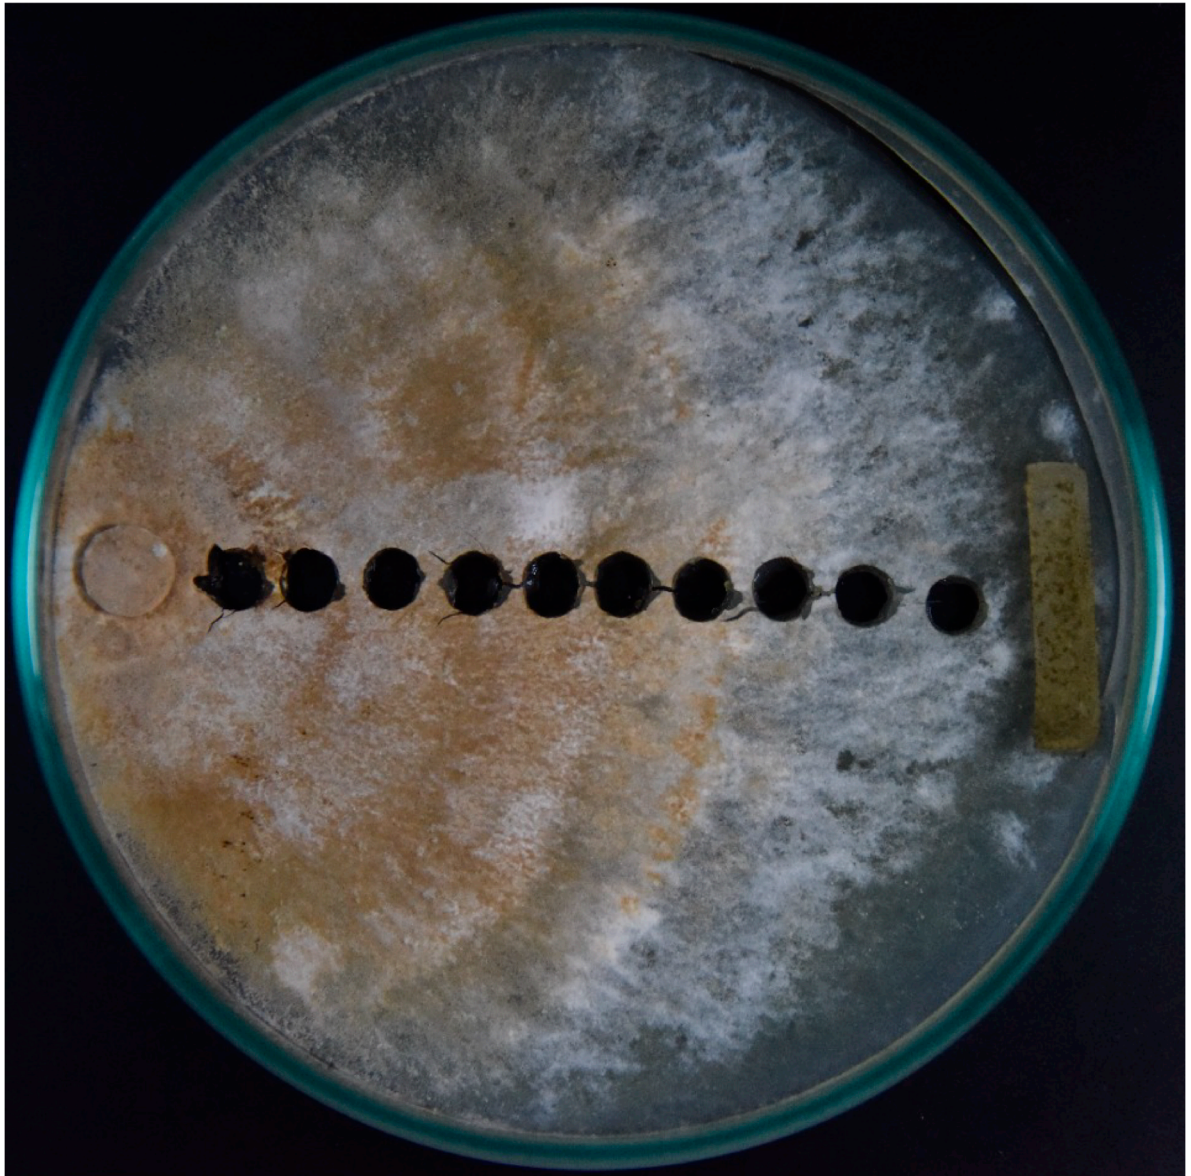

**Figure S1.** Location of the ten agar discs taken from the dual culture plate that were sub-cultured into two new PDA plates (Figure 1) to evaluate the mycoparasitism levels.

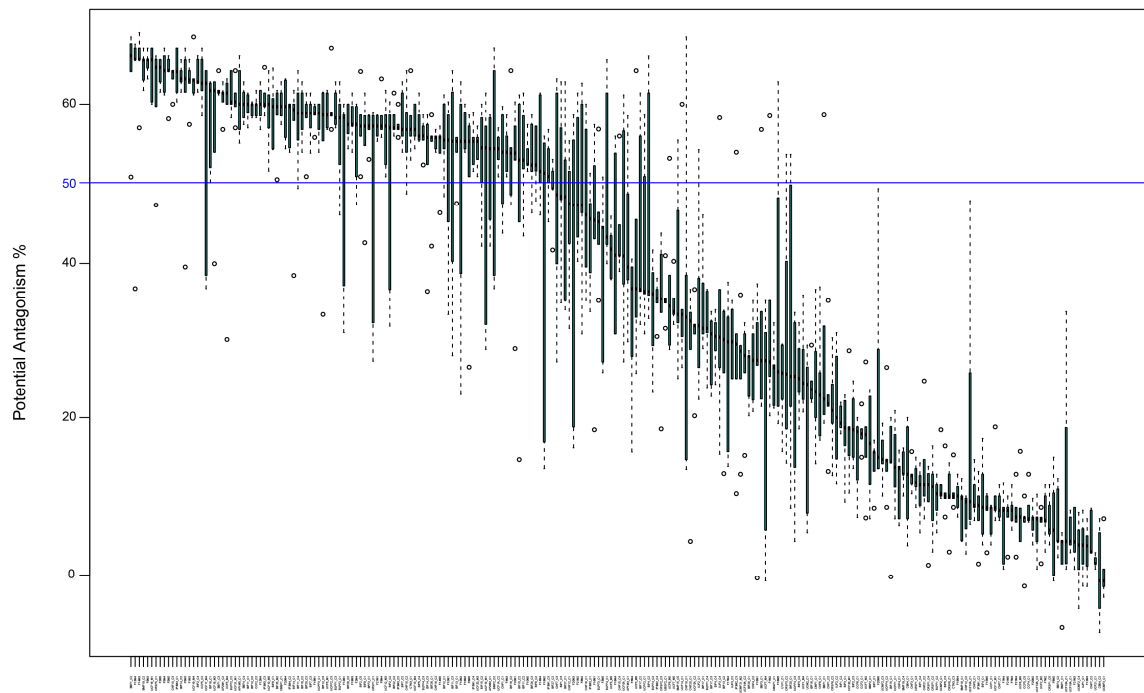

**Figure S2: Boxplot displaying the potential antagonism of 234 strains of *Trichoderma* spp. against *M. royeri* evaluated in this study. .**
